# Supplementary material for: Signature of the Paleo-Course Changes in the São Francisco River as Source of Genetic Structure in Neotropical Pithecopus nordestinus (Phyllomedusinae, Anura) Treefrog
Source: Front Genet. 2019 Aug 14;10:728. doi: 10.3389/fgene.2019.00728 (PMC6702341; doi:10.3389/fgene.2019.00728)
Supplement: Supplementary file 10 [file Table_6.xlsx]

## Sheet: Plan1
Table 6. Pairwise φST values obtained for ND2 dataset of the P. nordestinus populations. In bold, the statistical significant results.
	Ubajara/CE	Macaiba/RN	Tibau do Sul/RN	São Paulo do Potegi/RN	Araruna/PB	Mamanguape/PB	João Pessoa/PB	Cabaceiras/PB	Campina Grande/PB	Limoeiro/PE	Recife/PE	Bonito/PE	Poção/PE	Bom Conselho/PE	São Miguel dos Milagres/AL	Caruaru/PE	Passo de Camarajibe/AL	Pilar/AL	Satuba/AL	Rio Largo/AL	São Miguel dos Campos/AL	Laranjeiras/SE	Areia Branca/SE	Itabaiana/SE	Alagoinhas/BA	Mata de São João/BA	Maracás/BA	Gandú/BA	Jequié/BA	Aurelino Leal/BA
Macaiba/RN	0.42443
Tibau do Sul/RN	0.67702	-0.06977
São Paulo do Potegi/RN	0.38111	-0.04047	-0.125
Araruna/PB	0.46387	0.21648	0.32857	0.09803
Mamanguape/PB	0.78206	0.4401	-1	0.42077	0.56618
João Pessoa/PB	0.71568	0.3817	-1	0.36842	0.51912	0.03271
Cabaceiras/PB	0.27238	0.15108	0.03136	0.0371	0.01308	0.45492	0.40659
Campina Grande/PB	0.52204	0.27845	-0.7193	0.20054	0.29266	0.05462	0.07294	0.18033
Limoeiro/PE	0.87318	0.60135	0.96721	0.57923	0.70045	0.91598	0.86776	0.53922	0.66686
Recife/PE	0.80061	0.40201	0	0.4	0.58538	-0.07784	-0.03448	0.43576	0.03859	0.97467
Bonito/PE	0.67702	-0.06977	1	-0.2	0.28788	0.82857	0.6	-0.13469	0.24031	0.93548	1
Poção/PE	0.30644	0.19812	-0.03922	0.08912	0.16758	0.44341	0.38511	0.03016	0.18885	0.58263	0.41795	-0.10417
Bom Conselho/PE	0.69048	0.59028	0.87619	0.5746	0.72901	0.89313	0.83699	0.54887	0.68242	0.94473	0.92213	0.87192	0.46347
São Miguel dos Milagres/AL	0.78311	0.36016	1	0.31429	0.53253	0.87848	0.75758	0.30867	0.49498	0.94763	1	0	0.34176	0.91183
Caruaru/PE	0.71548	0.29095	0.72222	0.21053	0.40014	0.77452	0.66454	0.19081	0.39029	0.7808	0.86111	-0.25	0.22936	0.86051	0.32203
Passo de Camarajibe/AL	0.6701	0.15693	0.33333	0.07042	0.35252	0.76768	0.59585	0.09207	0.33168	0.67127	0.85507	-1	0.11695	0.83975	0.38462	0.0411
Pilar/AL	0.81429	0.66657	1	0.67258	0.80897	0.95503	0.90614	0.65163	0.76014	0.98901	1	1	0.60206	0.69048	1	0.95154	0.95317
Satuba/AL	0.65628	0.55082	0.77255	0.53333	0.69645	0.86066	0.79298	0.52602	0.65731	0.92629	0.87469	0.77255	0.44978	0.27397	0.86033	0.81333	0.76151	0.23221
Rio Largo/AL	0.67702	-0.06977	1	-0.2	0.28788	0.82857	0.6	-0.13469	0.24031	0.93548	1	1	-0.10417	0.87192	1	0.375	-0.2	1	0.77255
São Miguel dos Campos/AL	0.57376	0.48829	0.58696	0.4589	0.63684	0.80372	0.72368	0.46173	0.60228	0.88853	0.79348	0.58696	0.37567	0.1697	0.76808	0.72727	0.62842	0.32173	0.06789	0.58696
Laranjeiras/SE	0.95388	0.92856	0.92639	0.93021	0.95138	0.96416	0.95035	0.93541	0.94837	0.97664	0.95606	0.92473	0.93378	0.95946	0.95022	0.95098	0.93222	0.96541	0.94953	0.92639	0.93863
Areia Branca/SE	0.94654	0.92495	0.91961	0.92582	0.94496	0.9562	0.9429	0.93064	0.94271	0.96959	0.94691	0.91781	0.92881	0.95135	0.94096	0.94247	0.92509	0.95658	0.94191	0.91961	0.93229	-0.06402
Itabaiana/SE	0.96462	0.92102	0.86957	0.92364	0.95911	0.97864	0.9599	0.93441	0.95376	0.98969	0.9735	0.86667	0.93208	0.97385	0.96624	0.96424	0.91803	0.98315	0.95977	0.86957	0.93997	-0.12346	-0.22386
Alagoinhas/BA	0.96857	0.93529	0.94505	0.9388	0.96365	0.97956	0.96588	0.94441	0.95889	0.98897	0.9764	0.94382	0.94365	0.97604	0.97191	0.96972	0.95038	0.9834	0.96609	0.94505	0.95287	0.19666	0.12244	-0.0237
Mata de São João/BA	0.97925	0.92956	1	0.93466	0.97102	0.99268	0.97822	0.94453	0.96382	0.99854	1	1	0.94347	0.98971	1	0.98886	0.96685	1	0.97879	1	0.95852	0.08497	0.02941	-0.5	-0.42857
Maracás/BA	0.97119	0.94206	0.95708	0.94584	0.9667	0.98087	0.96925	0.94996	0.96233	0.98927	0.97854	0.95614	0.9497	0.97818	0.97498	0.97283	0.95906	0.98459	0.96995	0.95708	0.95912	0.58333	0.48031	0.40678	0.5765	0.70149
Gandú/BA	0.98035	0.93314	1	0.93804	0.97255	0.99306	0.97935	0.94747	0.96572	0.99861	1	1	0.94646	0.99025	1	0.98945	0.96859	1	0.9799	1	0.96066	0.48148	0.38318	-0.2	0.52381	1	0.44444
Jequié/BA	0.96931	0.92814	0.89637	0.93111	0.96362	0.98207	0.96536	0.9406	0.95835	0.99163	0.97901	0.89418	0.93879	0.97812	0.97328	0.97028	0.93229	0.98682	0.96569	0.89637	0.94769	0.4561	0.37775	0	0.42029	0.16667	0.39394	-1
Aurelino Leal/BA	0.97264	0.93599	0.94964	0.94008	0.96697	0.98407	0.97036	0.9464	0.96166	0.99236	0.98314	0.94853	0.9457	0.98087	0.97936	0.97562	0.95544	0.9888	0.97087	0.94964	0.95643	0.5424	0.42409	0.28358	0.52979	0.65	0.07015	0.44	0.32427
Caetité/BA	0.58734	0.52443	-0.2517	0.49177	0.6105	0.66473	0.55802	0.5451	0.63117	0.77626	0.53053	-0.26897	0.51982	0.62847	0.45803	0.50871	0.20071	0.65107	0.55326	-0.2517	0.48503	0.63844	0.66757	0.33076	0.54999	0.06122	0.59809	0.04663	0.35616	0.4734
