# Supplementary material for: Signature of the Paleo-Course Changes in the São Francisco River as Source of Genetic Structure in Neotropical Pithecopus nordestinus (Phyllomedusinae, Anura) Treefrog
Source: Front Genet. 2019 Aug 14;10:728. doi: 10.3389/fgene.2019.00728 (PMC6702341; doi:10.3389/fgene.2019.00728)
Supplement: Supplementary file 12 [file Table_8.xlsx]

## Sheet: Plan1
Table 8. Pairwise φST values obtained for Rhodopsin dataset of the P. nordestinus populations. In bold, the statistical significant results.
	Ubajara/CE	Macaiba/RN	Tibau do Sul/RN	São Paulo do Potegi/RN	Araruna/PB	Mamanguape/PB	João Pessoa/PB	Cabaceiras/PB	Campina Grande/PB	Limoeiro/PE	Recife/PE	Sanharó/PE	Poção/PE	Bom Conselho/PE	São Miguel dos Milagres/AL	Caruaru/PE	Passo de Camarajibe/AL	Pilar/AL	Satuba/AL	Rio Largo/AL	São Miguel dos Campos/AL	Couripe/AL	Laranjeiras/SE	Areia Branca/SE	Alagoinhas/BA	Maracás/BA	Jequié/BA	Aurelino Leal/BA	Bom Jesus da Lapa/BA
Macaiba/RN	0.16867
Tibau do Sul/RN	0.18904	-0.09169
São Paulo do Potegi/RN	-0.03226	-0.02167	0.00498
Araruna/PB	-0.00556	0.0473	0.15823	-0.06646
Mamanguape/PB	-0.04262	0.07227	0.18221	-0.06636	-0.06697
João Pessoa/PB	0.06047	-0.03927	-0.00652	-0.07692	-0.03762	-0.02083
Cabaceiras/PB	-0.05482	0.09504	0.09839	-0.03992	-0.00013	-0.02069	0.02479
Campina Grande/PB	-0.06236	0.11181	0.16134	-0.04089	-0.01256	-0.03622	0.02952	-0.03505
Limoeiro/PE	0.06325	0.02131	0.06326	-0.03198	-0.02004	-0.00699	-0.03238	0.0552	0.05453
Recife/PE	-0.09165	0.06072	0.16625	-0.09512	-0.09369	-0.10814	-0.0398	-0.05754	-0.07277	-0.02771
Sanharó/PE	-0.10037	-0.09169	0	-0.18343	-0.17351	-0.15949	-0.17381	-0.08855	-0.0879	-0.14879	-0.18728
Poção/PE	-0.07077	0.2055	0.24883	0.01943	0.049	0.01045	0.1117	-0.02178	-0.03219	0.12605	-0.03334	-0.01174
Bom Conselho/PE	0.04758	-0.00654	0.05382	-0.07056	-0.04479	-0.03354	-0.06071	0.02306	0.01982	-0.02403	-0.05448	-0.16953	0.09767
São Miguel dos Milagres/AL	0.36742	0.00627	-0.16691	0.13104	0.22858	0.26321	0.08538	0.22912	0.26901	0.14792	0.27282	0.11929	0.36853	0.13377
Caruaru/PE	-0.05809	0.12768	0.16749	-0.02281	-0.01182	-0.03279	0.0373	-0.01187	-0.02324	0.04685	-0.06957	-0.09856	-0.00804	0.02758	0.28946
Passo de Camarajibe/AL	0.02326	-0.24036	-0.26316	-0.15385	-0.05706	-0.008	-0.21509	-0.02857	0.03272	-0.19637	-0.01266	-0.26316	0.14162	-0.15835	-0.17647	-0.008
Pilar/AL	0.24269	0.03262	-0.13509	0.07277	0.19025	0.20308	0.08243	0.15477	0.19288	0.15762	0.1841	0.06946	0.26672	0.12545	0.01445	0.22393	-0.07105
Satuba/AL	0.2542	-0.02626	0.00709	0.02769	0.06949	0.10983	-0.02551	0.14734	0.16576	0.01711	0.11668	-0.07692	0.27352	0.00733	0.05104	0.16983	-0.29794	0.1212
Rio Largo/AL	0.27046	-0.0083	0.11111	0.05098	0.07739	0.12312	-0.01404	0.14826	0.17304	0.0068	0.14536	-0.05263	0.27836	0.014	0.09452	0.16602	-0.32663	0.15738	-0.05854
São Miguel dos Campos/AL	0.20562	-0.03547	-0.18239	0.02052	0.13307	0.15337	0.01363	0.11794	0.15582	0.08605	0.13738	-0.00535	0.24015	0.05889	-0.04648	0.1766	-0.1906	-0.05315	0.03423	0.07837
Couripe/AL	-0.43662	0.01891	0.11111	-0.2963	-0.26554	-0.32847	-0.1433	-0.33043	-0.35373	-0.14717	-0.40092	-0.37931	-0.36314	-0.17647	0.33721	-0.34061	0	0.12081	0.18367	0.3073	0.08651
Laranjeiras/SE	0.29222	0.15238	0.08628	0.17902	0.21643	0.23677	0.15298	0.25924	0.28203	0.16505	0.22189	0.08628	0.33783	0.18259	0.1764	0.26417	-0.14373	0.22554	0.14504	0.12182	0.16133	0.18921
Areia Branca/SE	0.32759	0.16901	0.11572	0.20478	0.23338	0.25581	0.17251	0.28941	0.30584	0.18493	0.24655	0.11572	0.35158	0.19953	0.18801	0.29212	-0.10769	0.24767	0.1559	0.13367	0.18363	0.2333	0.07936
Alagoinhas/BA	0.25361	0.1733	0.07796	0.17284	0.23166	0.24473	0.1662	0.23872	0.27449	0.1752	0.2162	0.07796	0.31517	0.2	0.21255	0.24804	-0.14198	0.22521	0.18983	0.1701	0.16582	0.13223	0.14119	0.08991
Maracás/BA	0.17489	0.12553	0	0.11111	0.19975	0.21127	0.1178	0.17541	0.22719	0.12242	0.17083	0	0.26372	0.15761	0.19105	0.19068	-0.26316	0.17412	0.17073	0.1773	0.11111	0	0.06093	-0.0298	-0.2037
Jequié/BA	0.29825	0.29066	0.22222	0.25926	0.35436	0.35732	0.28632	0.27109	0.33276	0.27356	0.32969	0.22222	0.37592	0.31408	0.3787	0.30102	0.11111	0.29699	0.38272	0.43558	0.27007	0.22581	0.2699	0.30303	-0.0786	-0.11111
Aurelino Leal/BA	0.34286	0.31162	0.25773	0.29134	0.37088	0.37568	0.30894	0.30346	0.35763	0.29854	0.35426	0.25773	0.40144	0.33393	0.38729	0.33162	0.14286	0.32267	0.38757	0.42048	0.29707	0.29412	0.29642	0.325	-0.02632	-0.04348	-0.26316
Bom Jesus da Lapa/BA	0.184	0.22074	0.11111	0.16667	0.29829	0.29865	0.21315	0.18182	0.26207	0.19539	0.25672	0.11111	0.30866	0.24855	0.33721	0.21727	0	0.22082	0.34755	0.44338	0.18769	0	0.18921	0.2333	-0.25749	-0.33333	-0.6	-0.5
Caetité/BA	0.184	0.22074	0.11111	0.16667	0.29829	0.29865	0.21315	0.18182	0.26207	0.19539	0.25672	0.11111	0.30866	0.24855	0.33721	0.21727	0	0.22082	0.34755	0.44338	0.18769	0	0.18921	0.2333	-0.25749	-0.33333	-0.6	-0.5	-1
