# Supplementary material for: Signature of the Paleo-Course Changes in the São Francisco River as Source of Genetic Structure in Neotropical Pithecopus nordestinus (Phyllomedusinae, Anura) Treefrog
Source: Front Genet. 2019 Aug 14;10:728. doi: 10.3389/fgene.2019.00728 (PMC6702341; doi:10.3389/fgene.2019.00728)
Supplement: Supplementary file 15 [file Table_11.xlsx]

## Sheet: Plan1
Table 11: Genetic distances between collection locations obtained for SiaH sequences of the P. nordestinus populations. Above the diagonal, the average number of sequences’ pairwise differences between locations (D); below the diagonal, the corrected average number of pairwise differences (DA). In grey, the average number of differences within each location.
	Ubajara/CE	Macaiba/RN	Tibau do Sul/RN	São Paulo do Potegi/RN	Araruna/PB	Mamanguape/PB	João Pessoa/PB	Cabaceiras/PB	Campina Grande/PB	Limoeiro/PE	Recife/PE	Sanharó/PE	Bonito/PE	Poção/PE	Bom Conselho/PE	São Miguel dos Milagres/AL	Caruaru/PE	Passo de Camarajibe/AL	Pilar/AL	Satuba/AL	Rio Largo/AL	São Miguel dos Campos/AL	Couripe/AL	Laranjeiras/SE	Areia Branca/SE	Alagoinhas/BA	Mata de São João/BA	Gandú/BA	Jequié/BA	Aurelino Leal/BA	Caetité/BA
Ubajara/CE	1	0.61538	1.25	0.625	0.83333	0.725	0.6	0.66667	0.75	0.75	0.75	0.75	1.25	0.625	0.5	0.64286	0.5	0.625	0.625	0.60714	0.6	0.7	0.5	4.66667	4.52273	6	5.5	6	5.5	3.875	4.25
Macaiba/RN	-0.03231	0.29538	1.07692	0.27885	0.54487	0.40385	0.28846	0.34295	0.49704	0.50641	0.57692	0.40385	1	0.36538	0.15385	0.2967	0.15385	0.36538	0.27885	0.28571	0.23846	0.35385	0.15385	4.65385	4.62587	6.15385	5.65385	6.15385	5.65385	3.90385	4.40385
Tibau do Sul/RN	-0.25	-0.07077	2	1	1.25	1.25	1.05	1.125	1.11538	1.08333	1	1.25	1.5	1	1	1.14286	1	1	1.125	1.07143	1.1	1.2	1	5.5	5.31818	7	6.5	7	6.5	4.75	5.25
São Paulo do Potegi/RN	0	0.00615	-0.125	0.25	0.54167	0.375	0.275	0.33333	0.50962	0.54167	0.625	0.375	1.125	0.375	0.125	0.26786	0.125	0.375	0.25	0.26786	0.225	0.325	0.125	4.625	4.625	6.125	5.625	6.125	5.625	3.875	4.375
Araruna/PB	-0.05303	0.01082	-0.13636	0.0303	0.77273	0.63333	0.525	0.59722	0.67949	0.72222	0.75	0.66667	1.25	0.58333	0.41667	0.55952	0.41667	0.58333	0.54167	0.53571	0.51667	0.61667	0.41667	4.91667	4.85606	6.41667	5.91667	6.41667	5.91667	4.16667	4.66667
Mamanguape/PB	-0.01447	0.01668	0.01053	0.01053	0.0075	0.47895	0.4	0.45833	0.61923	0.66667	0.75	0.45	1.25	0.5	0.25	0.39286	0.25	0.5	0.3625	0.39286	0.35	0.45	0.25	4.68333	4.67273	6.15	5.65	6.15	5.65	3.925	4.4
João Pessoa/PB	-0.04474	-0.00397	-0.09474	0.00526	-0.0061	0.01579	0.28947	0.34167	0.47692	0.5	0.55	0.4	1.05	0.35	0.15	0.29286	0.15	0.35	0.275	0.27857	0.25	0.35	0.15	4.65	4.61364	6.15	5.65	6.15	5.65	3.9	4.4
Cabaceiras/PB	-0.03804	-0.00945	-0.07971	0.00362	0.00615	0.01415	-0.00778	0.40942	0.54808	0.5625	0.625	0.45833	1.08333	0.41667	0.20833	0.35119	0.20833	0.41667	0.33333	0.33929	0.3	0.40833	0.20833	4.70833	4.67803	6.20833	5.70833	6.20833	5.70833	3.95833	4.45833
Campina Grande/PB	-0.06692	0.03243	-0.20154	0.06769	-0.0238	0.06283	0.01526	0.02644	0.63385	0.62179	0.61538	0.63462	1.11538	0.5	0.38462	0.52747	0.38462	0.5	0.50962	0.48901	0.48462	0.58462	0.38462	4.88462	4.78671	6.38462	5.88462	6.38462	5.88462	4.13462	4.63462
Limoeiro/PE	-0.06159	0.04712	-0.22826	0.10507	0.02426	0.1156	0.04367	0.0462	-0.00672	0.62319	0.58333	0.66667	1	0.5	0.41667	0.55952	0.41667	0.5	0.54167	0.5119	0.5	0.61667	0.41667	4.91667	4.79545	6.41667	5.91667	6.41667	5.91667	4.16667	4.66667
Recife/PE	-0.25	-0.07077	-0.5	0	-0.13636	0.01053	-0.09474	-0.07971	-0.20154	-0.22826	1	0.75	1	0.5	0.5	0.64286	0.5	0.5	0.625	0.57143	0.6	0.7	0.5	5	4.81818	6.5	6	6.5	6	4.25	4.75
Sanharó/PE	0	0.00615	0	0	0.0303	-0.03947	0.00526	0.00362	0.06769	0.10507	0	0.5	1.25	0.5	0.25	0.39286	0.25	0.5	0.34375	0.39286	0.35	0.45	0.25	4.75	4.75	6.25	5.75	6.25	5.75	4	4.5
Bonito/PE	-0.25	-0.14769	-0.5	0	-0.13636	0.01053	-0.09474	-0.12138	-0.20154	-0.31159	-0.5	0	2	1	1	1.14286	1	1	1.125	1.07143	1	1.2	1	5.5	5.31818	7	6.5	7	6.5	4.75	5.25
Poção/PE	-0.125	-0.03231	-0.25	0	-0.05303	0.01053	-0.04474	-0.03804	-0.06692	-0.06159	-0.25	0	-0.25	0.5	0.25	0.39286	0.25	0.375	0.375	0.35714	0.35	0.45	0.25	4.75	4.65909	6.25	5.75	6.25	5.75	4	4.5
Bom Conselho/PE	0	0.00615	0	0	0.0303	0.01053	0.00526	0.00362	0.06769	0.10507	0	0	0	0	0	0.14286	0	0.25	0.125	0.14286	0.1	0.2	0	4.5	4.5	6	5.5	6	5.5	3.75	4.25
São Miguel dos Milagres/AL	0.01099	0.01714	0.01099	0.01099	0.04129	0.02152	0.01625	0.01461	0.07868	0.11606	0.01099	0.01099	0.01099	0.01099	0.01099	0.26374	0.14286	0.39286	0.26786	0.28571	0.24286	0.34286	0.14286	4.64286	4.64286	6.14286	5.64286	6.14286	5.64286	3.89286	4.39286
Caruaru/PE	0	0.00615	0	0	0.0303	0.01053	0.00526	0.00362	0.06769	0.10507	0	0	0	0	0	0.01099	0	0.25	0.125	0.14286	0.1	0.2	0	4.5	4.5	6	5.5	6	5.5	3.75	4.25
Passo de Camarajibe/AL	-0.125	-0.03231	-0.25	0	-0.05303	0.01053	-0.04474	-0.03804	-0.06692	-0.06159	-0.25	0	-0.25	-0.125	0	0.01099	0	0.5	0.375	0.35714	0.35	0.45	0.25	4.75	4.65909	6.25	5.75	6.25	5.75	4	4.5
Pilar/AL	0	0.00615	0	0	0.0303	-0.00197	0.00526	0.00362	0.06769	0.10507	0	-0.03125	0	0	0	0.01099	0	0	0.25	0.25893	0.225	0.3	0.125	4.625	4.625	6.125	5.625	6.125	5.625	3.875	4.375
Satuba/AL	-0.03571	-0.00484	-0.07143	0	0.00649	0.01053	-0.00902	-0.00828	0.02923	0.05745	-0.07143	0	-0.07143	-0.03571	0	0.01099	0	-0.03571	-0.00893	0.28571	0.24286	0.31429	0.14286	4.64286	4.61688	6.14286	5.64286	6.14286	5.64286	3.89286	4.39286
Rio Largo/AL	0	-0.00923	0	0	0.0303	0.01053	0.00526	-0.00471	0.06769	0.08841	0	0	-0.1	0	0	0.01099	0	0	0	0	0.2	0.3	0.1	4.6	4.6	6.1	5.6	6.1	5.6	3.85	4.35
São Miguel dos Campos/AL	0.02222	0.02838	0.02222	0.02222	0.05253	0.03275	0.02749	0.02585	0.08991	0.12729	0.02222	0.02222	0.02222	0.02222	0.02222	0.03321	0.02222	0.02222	-0.00278	-0.00635	0.02222	0.35556	0.2	4.7	4.7	6.2	5.7	6.2	5.7	3.95	4.45
Couripe/AL	0	0.00615	0	0	0.0303	0.01053	0.00526	0.00362	0.06769	0.10507	0	0	0	0	0	0.01099	0	0	0	0	0	0.02222	0	4.5	4.5	6	5.5	6	5.5	3.75	4.25
Laranjeiras/SE	2.66667	3.00615	3	3	3.0303	2.94386	3.00526	3.00362	3.06769	3.10507	3	3	3	3	3	3.01099	3	3	3	3	3	3.02222	3	3	2.9697	2.16667	2.16667	1.83333	2	3.33333	2.75
Areia Branca/SE	2.43615	2.8916	2.7316	2.91342	2.88312	2.84667	2.88232	2.88674	2.88321	2.89728	2.7316	2.91342	2.7316	2.82251	2.91342	2.92441	2.91342	2.82251	2.91342	2.88745	2.91342	2.93564	2.91342	-0.11688	3.17316	2.5	2.22727	2.59091	2.52273	3.22727	2.56818
Alagoinhas/BA	4.9	5.40615	5.4	5.4	5.4303	5.31053	5.40526	5.40362	5.46769	5.50507	5.4	5.4	5.4	5.4	5.4	5.41099	5.4	5.4	5.4	5.4	5.4	5.42222	5.4	0.06667	0.31342	1.2	1	1	1.25	3.25	2.25
Mata de São João/BA	4.5	5.00615	5	5	5.0303	4.91053	5.00526	5.00362	5.06769	5.10507	5	5	5	5	5	5.01099	5	5	5	5	5	5.02222	5	0.16667	0.14069	-0.1	1	1.5	1.5	2.75	1.75
Gandú/BA	5.5	6.00615	6	6	6.0303	5.91053	6.00526	6.00362	6.06769	6.10507	6	6	6	6	6	6.01099	6	6	6	6	6	6.02222	6	0.33333	1.00433	0.4	1	0	0.5	3.25	2.25
Jequié/BA	4.5	5.00615	5	5	5.0303	4.91053	5.00526	5.00362	5.06769	5.10507	5	5	5	5	5	5.01099	5	5	5	5	5	5.02222	5	0	0.43615	0.15	0.5	0	1	2.75	1.75
Aurelino Leal/BA	2.29167	2.67282	2.66667	2.66667	2.69697	2.60219	2.67193	2.67029	2.73436	2.77174	2.66667	2.66667	2.66667	2.66667	2.66667	2.67766	2.66667	2.66667	2.66667	2.66667	2.66667	2.68889	2.66667	0.75	0.55736	1.56667	1.16667	2.16667	1.16667	2.16667	1.5
Caetité/BA	3.5	4.00615	4	4	4.0303	3.91053	4.00526	4.00362	4.06769	4.10507	4	4	4	4	4	4.01099	4	4	4	4	4	4.02222	4	1	0.7316	1.4	1	2	1	0.16667	0.5
